# Supplementary material
Source: PubMed Central journal article supplement (PMC7611178)
Supplement: EMS127943-supplement-Suppl_Fig_1_20__Suppl_Table_1_5.pdf [file EMS127943-supplement-Suppl_Fig_1_20__Suppl_Table_1_5.pdf]

**Supplementary Information**

**Targeting herpes simplex virus with CRISPR-Cas9 cures herpetic stromal keratitis in mice**

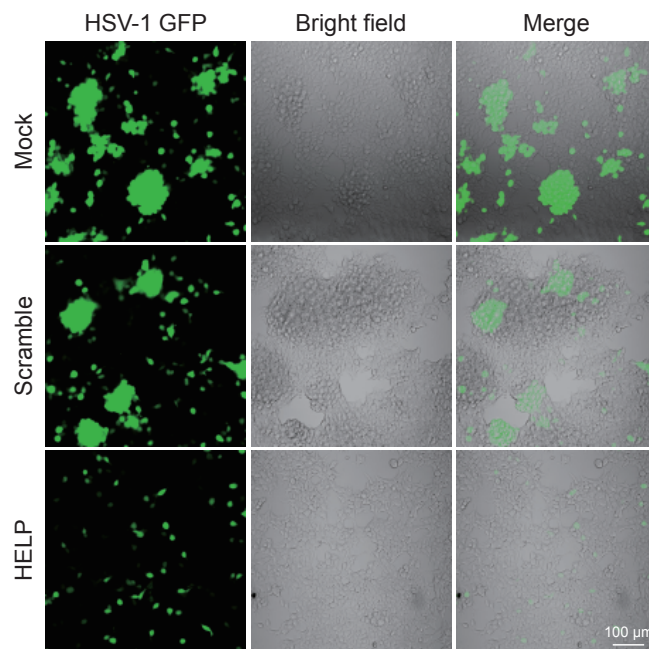

**Supplementary Fig. 1 The antiviral activity of HELP in 293T cells.** Cells were seeded 24 h before transduction of HELP (400 ng p24) at a density of  $4 \times 10^4$ /well. 24 h after transduction, cells were infected with HSV1-GFP. Photographing was performed two days after HSV1-GFP infection (MOI=1). Scale bars, 100  $\mu$ m. The experiment was repeated twice with similar results.

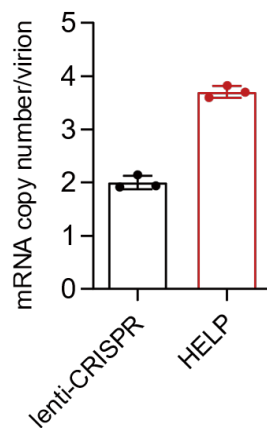

**Supplementary Fig. 2 The copy number of Cas9 mRNA in each HELP particle.** Lenti-CRISPR is a standard lentiviral vector encoding Cas9 and gRNA. To detect the copy number of Cas9 mRNA in each HELP particle, the same amount p24 of HELP and lenti-CRISPR was used to extract total RNA and synthesized to cDNA for RT-qPCR. Data of HELP was normalized to lenti-CRISPR. n=three biologically independent replicates. Data and error bars represent mean  $\pm$  SEM.

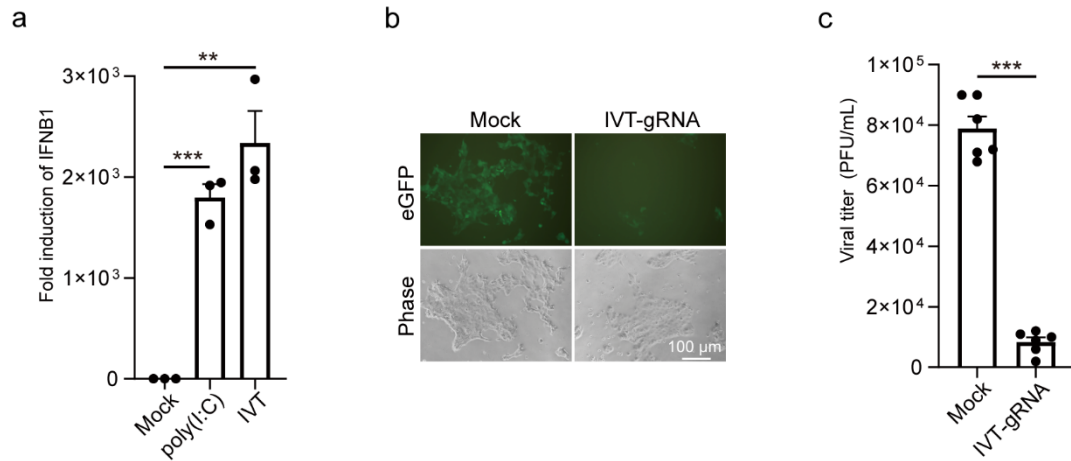

**Supplementary Fig. 3 Innate immune stimulator inhibits HSV1-GFP replication.** **a**, Fold induction of IFNB1 by UL8-targeting *in vitro* transcribed gRNA (IVT-gRNA) and poly(I:C) in HaCaT cells. RNA was isolated from HaCaT cells 6 h after infection or transfection. IVT-gRNA vs. Mock, Mock vs. poly(I:C),  $P=0.0002$ ; Mock vs. IVT-gRNA,  $P=0.0018$ .  $n=$ three biologically independent replicates. **b**, The antiviral activity of IVT-gRNA. Representative fluorescent and phase-contrast photographs of HaCaT cells 24 h after IVT-gRNA transfection. IVT-gRNA transfection was performed 1 h after HSV1-GFP infection (MOI=1.5). No Cas9 was provided. **c**, Plaque assay analysis of infectious viruses in supernatants harvested from mock and IVT-gRNA treated cells (from **b**).  $P < 0.0001$ .  $n=$ six biologically independent replicates. Data and error bars represent mean  $\pm$  SEM. Unpaired two-tailed Student's t-tests were performed. Scale bars, 100  $\mu$ m.

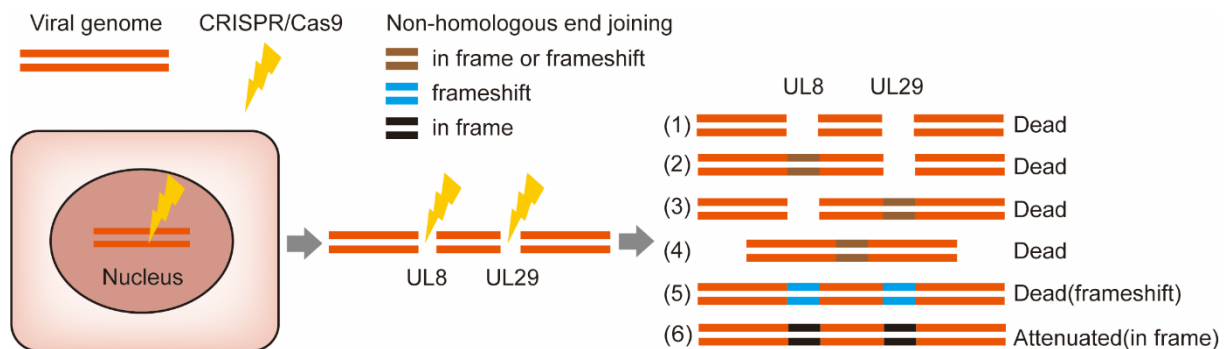

**Supplementary Fig. 4 Illustration of the possible outcomes of HSV-1 genome after HELP cleavage.** If the DSBs are not repaired (outcome 1-3), the viral genome un-replicable. If the breaks are repaired but causing large deletion or frameshift, the virus is also dead (outcome 4 and 5). If the DSBs are repaired and in frame, the virus is alive but attenuated (outcome 6).

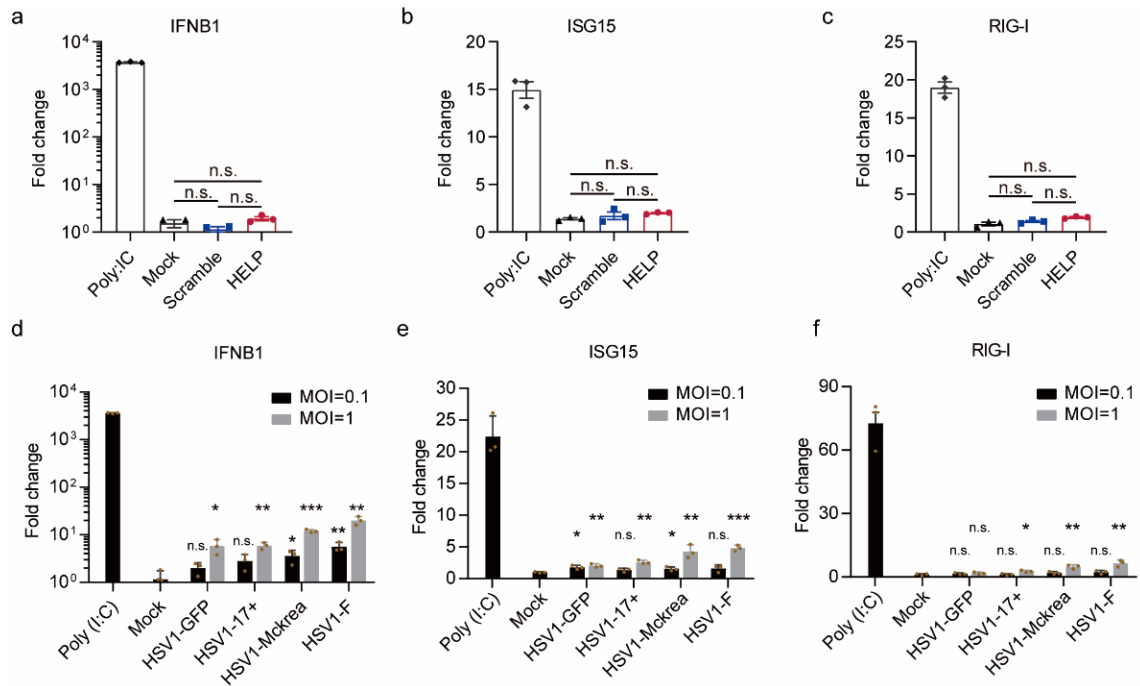

**Supplementary Fig. 5 The innate immune response induced by HELP and different HSV-1 strains in THP-1 derived macrophages.** Cells were harvested for IFNB1, ISG15 and RIG-I analysis by RT-qPCR 6 h after transduction (**a-c**) or infection (**d-f**). **d**, Mock vs. HSV1-Mckrea and HSV1-F at MOI=0.1,  $P=0.0293$  and  $0.0059$ ; Mock vs. HSV1-GFP, HSV1-17+ and HSV1-F at MOI=1,  $P=0.0198$ ,  $0.0019$  and  $0.0015$ , respectively. Mock vs. HSV1-Mckrea at MOI=1,  $P<0.0001$ . **e**, Mock vs. HSV1-17+, HSV1-Mckrea and HSV1-F at MOI=1,  $P=0.0162$ ,  $0.0036$  and  $0.0042$ , respectively. **f**, Mock vs. HSV1-GFP and HSV1-Mckrea at MOI=0.1,  $P=0.0146$  and  $0.0387$ ; Mock vs. HSV1-GFP, HSV1-17+, HSV1-Mckrea and HSV1-F at MOI=1,  $P=0.0034$ ,  $0.0010$ ,  $0.0058$  and  $0.0001$ , respectively.  $n=$ three biologically independent replicates. Data and error bars represent mean  $\pm$  SEM. One-way ANOVA with Dunnett's multiple comparisons test (**a-c**) and unpaired two-tailed Student's t-tests (**d-f**) were performed. n.s.=non-significant.

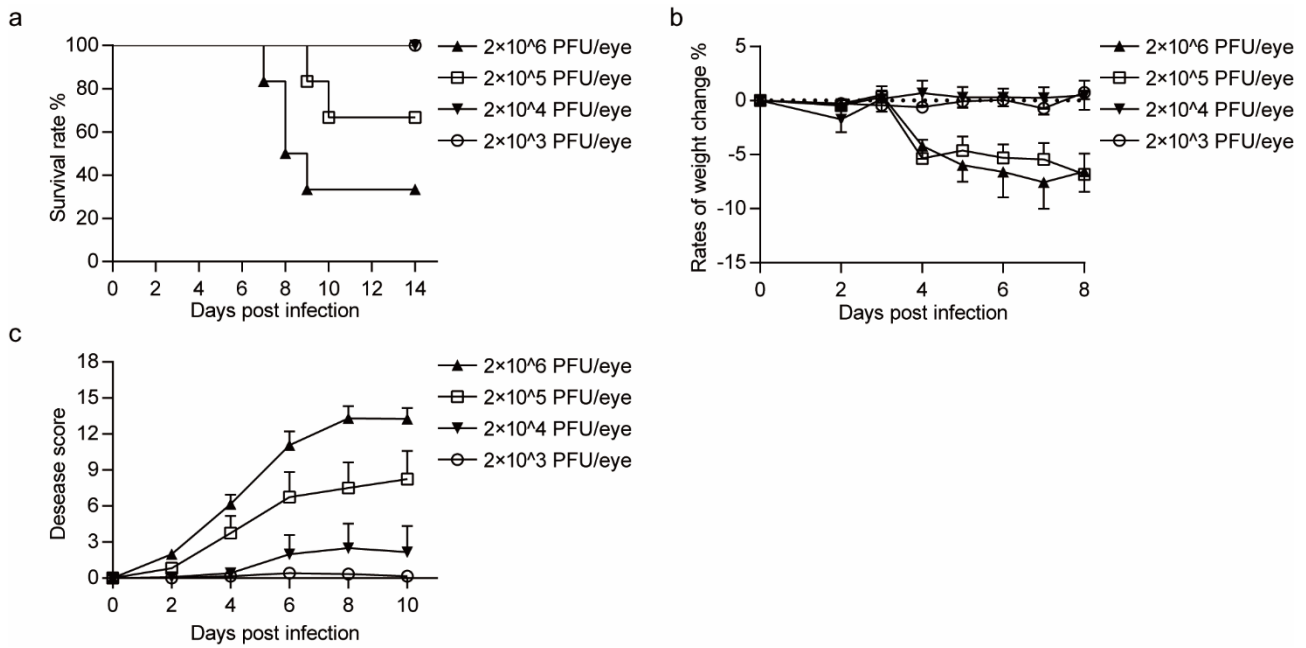

**Supplementary Fig. 6 Dose-response and keratitis symptoms.** The mice were inoculated with different dosages of HSV-1 17syn+ on scarified corneas and recorded for survival rates, body weights, and disease scores on the indicated days after infection. n=6 mice. Data and error bars represent mean ± SEM.

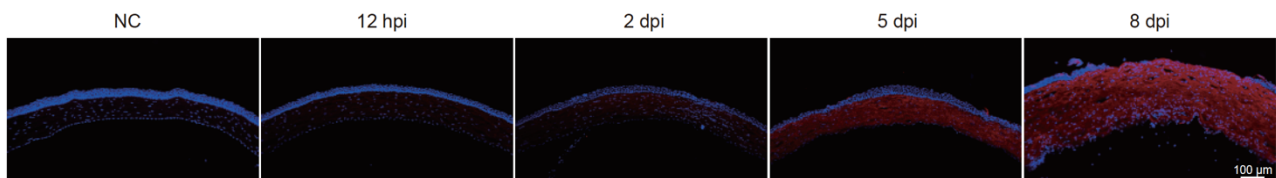

**Supplementary Fig. 7 Time course of HSV-1 infection in the corneas.** The mice were inoculated with 2×10<sup>6</sup> PFU HSV-1 17syn+ on scarified corneas. Sections were prepared on 12 hours post infection, 2, 5, and 8 days post infection, respectively. hpi, hour post infection; dpi, days post infection. The experiment was repeated twice with similar results.

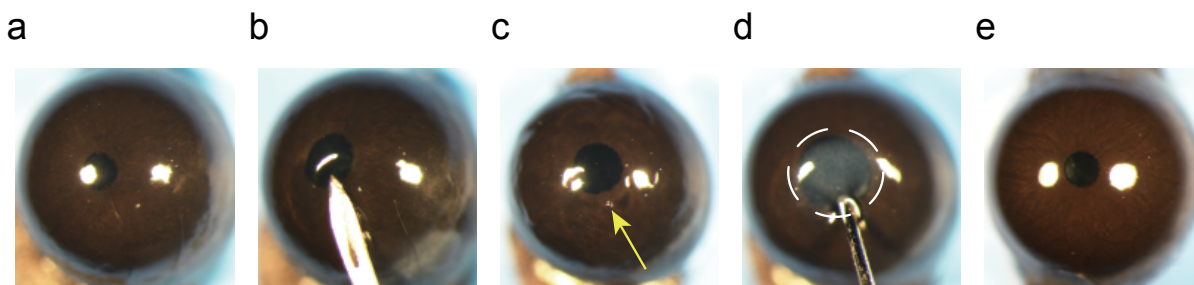

**Supplementary Fig. 8 Intraström injection of mouse corneas.** **a**, An eye of C57BL/6J mouse before injection; **b** and **c**, A small pocket was created in the mid-peripheral cornea using a 29G needle. **d**, Injection of PBS with a 33G needle. **e**, The eye 5 days after injection.

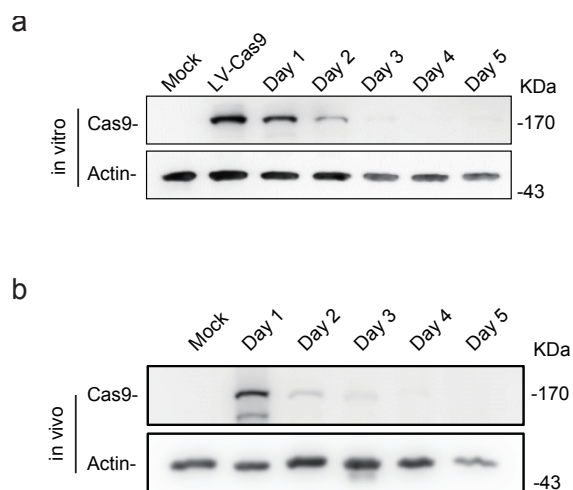

**Supplementary Fig. 9 Western blot analysis of the life-span of Cas9 by HELP delivery.** **a**. The life-span of Cas9 protein by HELP and lentivirus delivery *in vitro*. 293T cells were seeded 24 h before transduction at a density of  $4 \times 10^4$ /well. 100 ng p24 used for each vector. **b**. The life-span of Cas9 protein after intraström delivery of HELP. 100 ng p24 of HELP was used for each eye by intraström injection. The experiment was repeated twice with similar results.

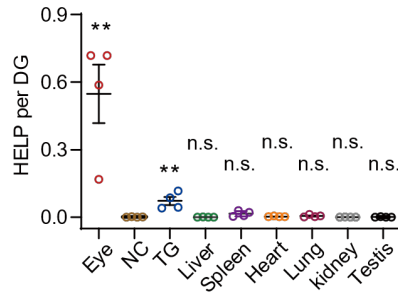

**Supplementary Fig. 10 Tissue distribution of HELP in the whole body.** qPCR quantification of HELP dissemination in different tissues as viral genome (VG) per diploid genome (DG) (n=4 mice). NC vs. Eye,  $P=0.0057$ ; NC vs. TG,  $P=0.0077$ . Data and error bars represent mean  $\pm$  SEM. Unpaired two-tailed Student's t-tests were performed. n.s.=non-significant.

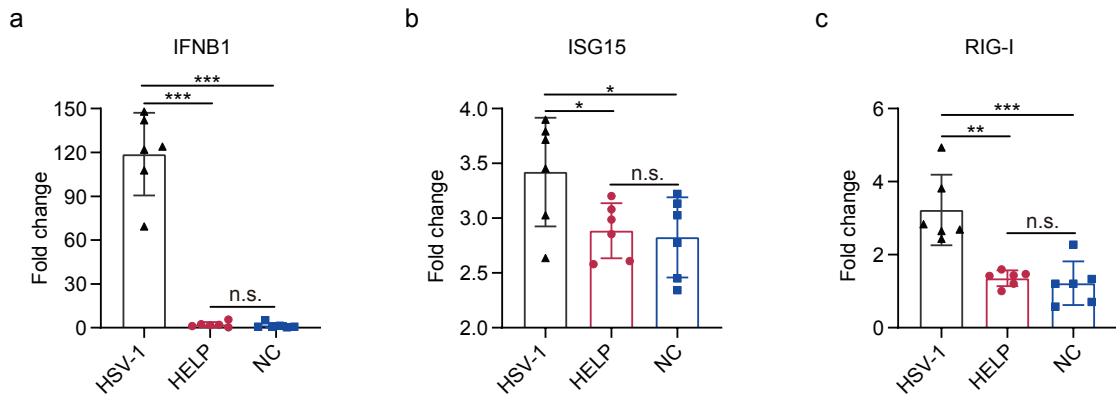

**Supplementary Fig. 11 The innate immune response induced HELP and HSV-1 infection *in vivo*.** Eyes were harvested for IFNB1 (a), ISG15 (b) and RIG-I (c) analysis by RT-qPCR 24 h after intrastromal injection of HSV-1 17syn+ ( $10^5$  PFU) and 100 ng p24 HELP, respectively (n=5 mice). a,  $P<0.0001$ . b, HSV-1 vs. HELP,  $P=0.0399$ ; HSV-1 vs. NC,  $P=0.0395$ . c, HSV-1 vs. HELP,  $P=0.0015$ ; HSV-1 vs. NC,  $P=0.0009$ . Data and error bars represent mean  $\pm$  SEM. Unpaired two-tailed Student's t-tests were performed. n.s.=non-significant.

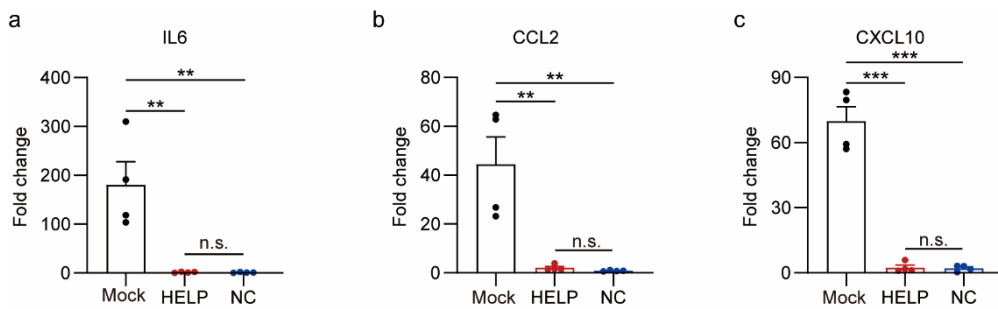

**Supplementary Fig. 12 Inflammatory cytokines expressed in the corneas following HSV-1 17syn+ infection.** Corneas were processed for RT-PCR analysis of inflammatory molecules (IL6, CCL2, and CXCL10) two weeks after HSV-1 17syn+ infection ( $2 \times 10^6$  PFU) of corneas (n=4 mice). **a**, Mock vs. HELP,  $P=0.0089$ ; Mock vs. NC,  $P=0.0088$ . **b**, Mock vs. HELP,  $P=0.0093$ ; Mock vs. NC,  $P=0.0081$ . **c**,  $P<0.0001$ . Data and error bars represent mean  $\pm$  SEM. Unpaired two-tailed Student's t-tests were performed. n.s.=non-significant.

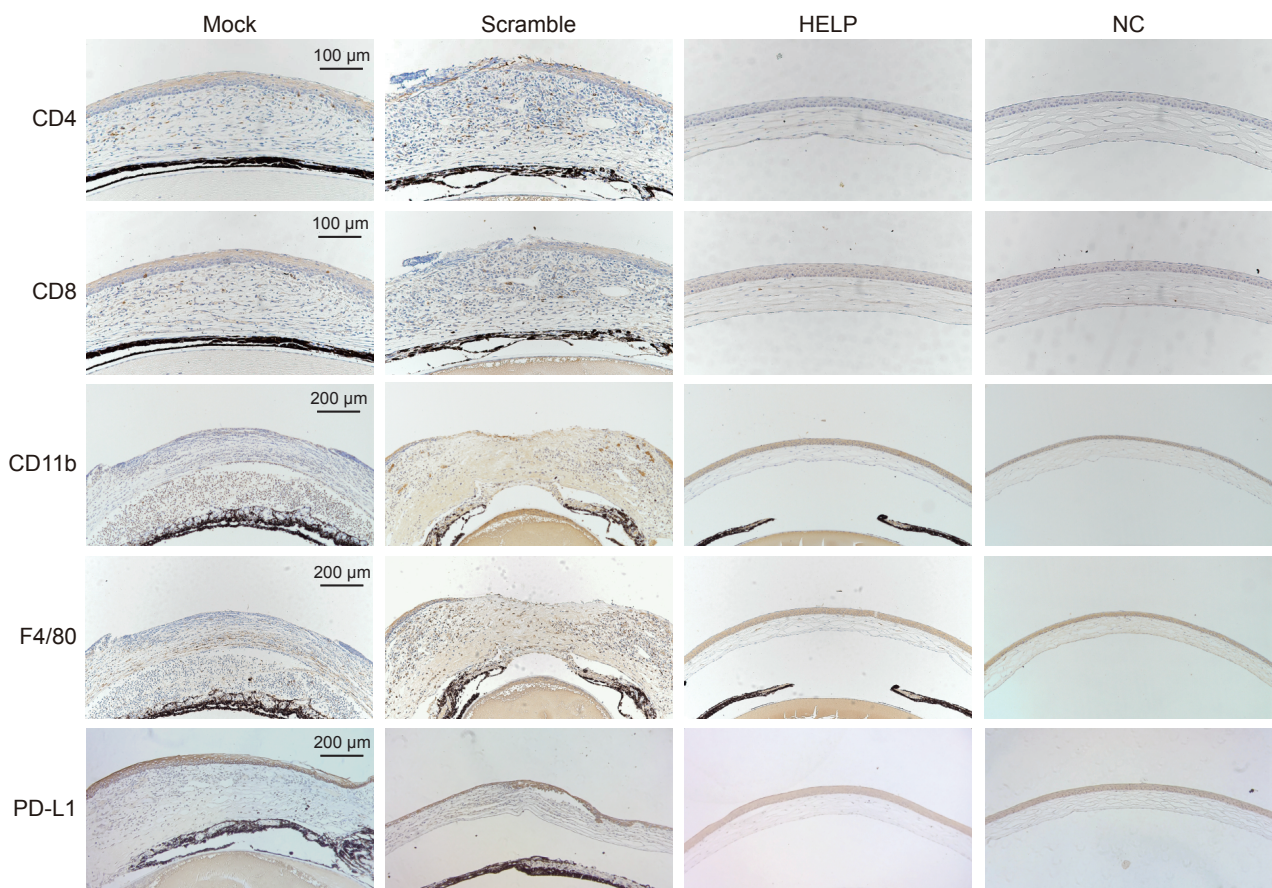

**Supplementary Fig. 13 Immune cells infiltration and PD-L1 expression in the corneas *in vivo*.** The corneas of mice were treated with HELP one day before infection with HSV-1 17syn+ ( $2 \times 10^6$  PFU). Immunohistochemistry analysis of CD4<sup>+</sup>, CD8<sup>+</sup> cells, myeloid-derived cells (CD11b<sup>+</sup>), and macrophages (F4/80<sup>+</sup>) infiltration as well as PD-L1 expression in the corneas 14 days after infection. n=2 mice for each group. The experiment was repeated once. Scale bars, 100 μm or 200 μm.



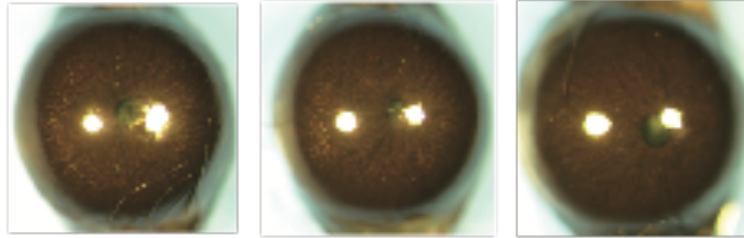

**Supplementary Fig. 14 Long term follow-up of HELP treated mice in the preventive model.**

The mice were treated with HELP before inoculation with  $2 \times 10^6$  PFU HSV-1 17syn+ on scarified corneas. Representative graphs show eyes from three different mice that have been followed up for three months.

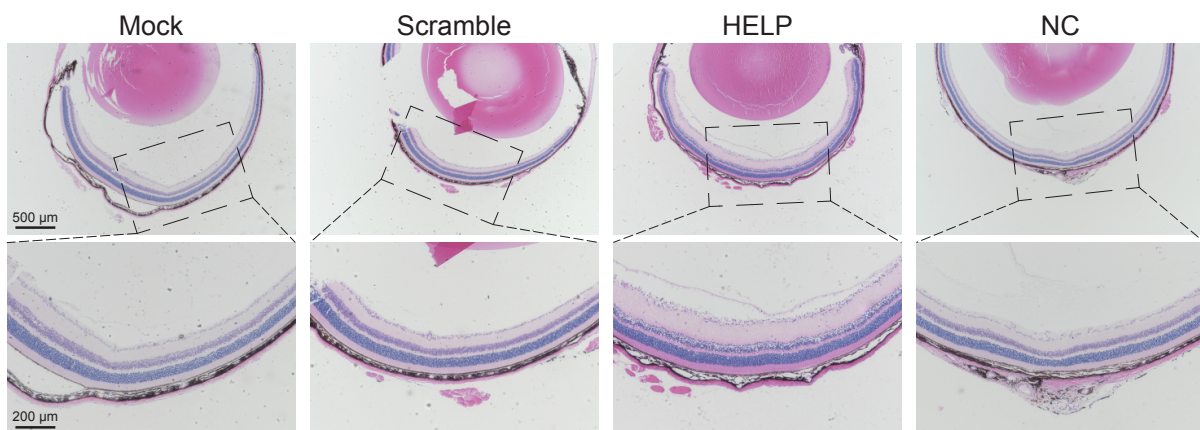

**Supplementary Fig. 15** Histological analysis of the retina of mouse eyes. The corneas of mice were treated with HELP one day before infection with HSV-1 17syn+ ( $2 \times 10^6$  PFU). The histology of retina was analysed 14 days after infection. n=4 mice for each independent experiment. Scale bars, 500 µm or 200 µm.

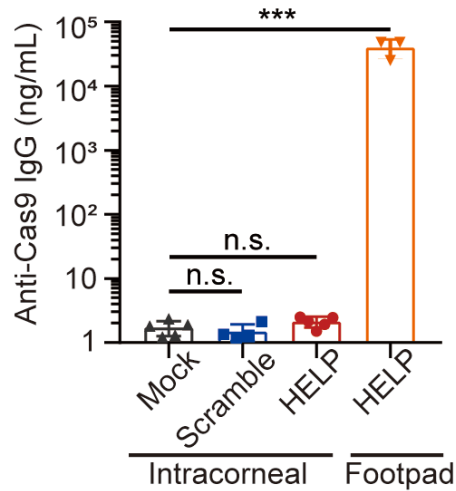

**Supplementary Fig. 16 Cas9-specific IgG in the serum.** Mouse sera were collected at 14 dpi and analysed for anti-Cas9 IgG induction by HELP and non-targeting (scramble) mLP (n=5 mice). 100 ng p24 HELP and scramble or 2  $\mu$ L PBS were injected into mice cornea by intrastromal injection. Footpad injection of 100 ng p24 HELP used as a positive control (n=3 mice). Mock vs. HELP (Footpad injection),  $P=0.0004$ . Data and error bars represent mean  $\pm$  SEM. Unpaired two-tailed Student's t-tests were performed. n.s.=non-significant.

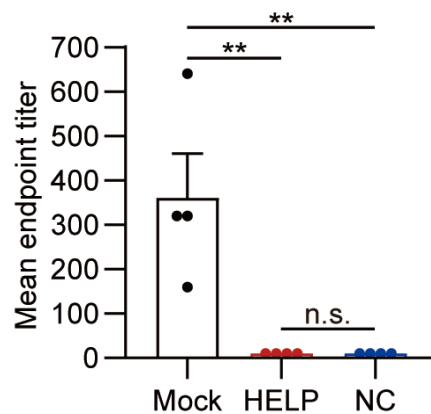

**Supplementary Fig. 17 Neutralizing antibodies induced by HSV-1 infection.** Mouse sera were collected at 28 dpi and analysed for HSV-1 neutralizing antibodies after HELP and Mock treatment. 100 ng p24 HELP or 2  $\mu$ L PBS were injected into mice cornea by intrastromal injection. n=4 mice.  $P=0.0039$ . Data and error bars represent mean  $\pm$  SEM. One-way ANOVA with Dunnett's multiple comparisons test. were performed. n.s.=non-significant.

| Sample ID                                | HELP                  | MOCK                |
|------------------------------------------|-----------------------|---------------------|
| Total_Reads                              | 1,059,941,298         | 938,567,089         |
| Duplicates                               | 160,681,499(15.16%)   | 136,392,833(14.53%) |
| Mapped_Reads                             | 1,002,190,283(94.55%) | 877,072,911(93.45%) |
| Properly_Mapped                          | 979,842,046(92.44%)   | 856,870,912(91.3%)  |
| PE_mapped                                | 993,576,616(93.74%)   | 867,894,498(92.47%) |
| SE_mapped                                | 1,368,621(0.13%)      | 2,862,324(0.3%)     |
| With_Mate_Mapped_to_Diff_Chrom           | 11,346,098(1.07%)     | 8,304,416(0.88%)    |
| With_Mate_Mapped_to_Diff_Chrom (mapQ>=5) | 9,090,186(0.86%)      | 5,548,136(0.59%)    |
| Mean_Sequencing_Depth                    | 51.2459               | 44.5995             |
| Coverage                                 | 92.38%                | 92.34%              |
| Coverage_above_4X                        | 92.3%                 | 92.26%              |
| Coverage_above_10X                       | 91.85%                | 92.05%              |
| Coverage_above_20X                       | 90.73%                | 89.93%              |
| Coverage_above_30X                       | 86.24%                | 83.74%              |

**Supplementary Fig. 18 The overall quality of WGS data.** Quality of whole genome sequencing (WGS) data for HELP and Mock treated the human corneal punches which were derived from the same donor.

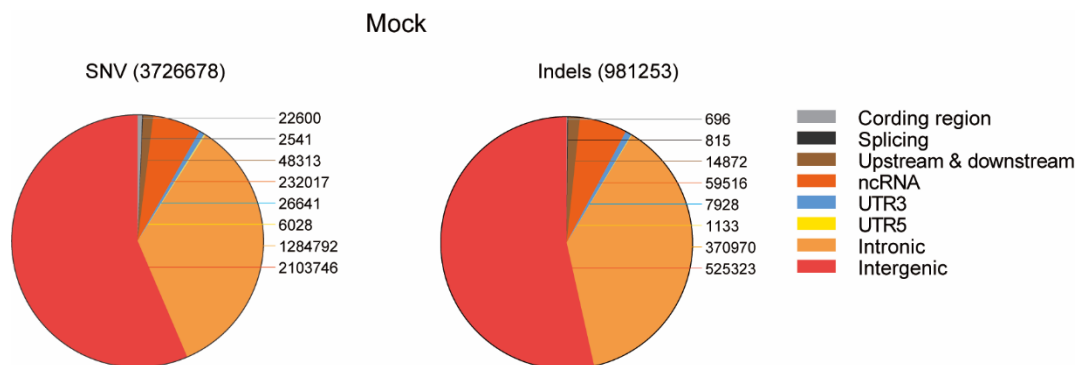

**Supplementary Fig. 19 Identification of SNV and indel mutations in the Mock treated corneal punch at WGS level.** Valid sequencing data were aligned to Human Genome version 19 (HG19).

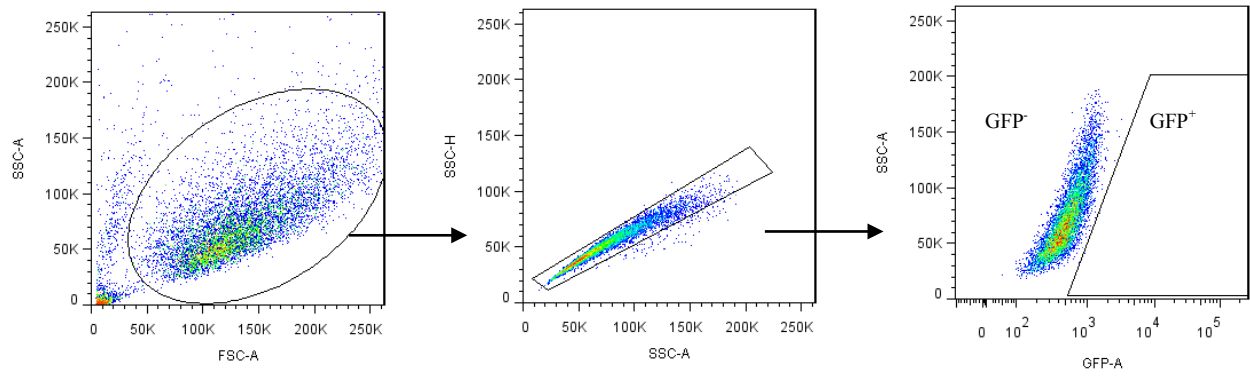

**Supplementary Fig. 20 Gating strategies used for flow cytometry analysis.** Gating strategy used to analyse GFP<sup>+</sup> cells in HSV1-GFP infected primary mouse corneal stromal cells in Fig. 1k-1l.

## Supplementary Table 1

Unique SNVs and indels in the HELP (UL8 gRNA) treated human cornea uncovered by whole genome sequencing.

| HELP induced SNVs and indels (UL8 gRNA) |           |      |     |            |                   |         |                         |                         |  |
|-----------------------------------------|-----------|------|-----|------------|-------------------|---------|-------------------------|-------------------------|--|
| #CHRO                                   | POS       | REF  | ALT | Func       | Gene              | MutType | DNA                     | crRNA                   |  |
| chr2                                    | 220873076 | C    | CA  | intergenic | MIR4268;EPHA4     | InDel   | GGGGCAGCCAcACaGaGTgAGGG | GGGGCAGCCATACCGCGTAANGG |  |
| chr16                                   | 27851353  | CTTT | C   | intronic   | GSG1L             | InDel   | GGGGCtGCCATcCCcCtTcAGGG | GGGGCAGCCATACCGCGTAANGG |  |
| chr17                                   | 22005942  | C    | T   | intergenic | FLJ36000;MTRNR2L1 | SNP     | GGGGCAGCgAggCCGaGTgATGG | GGGGCAGCCATACCGCGTAANGG |  |
| chr1                                    | 115881954 | C    | T   | intergenic | NGF;VANGL1        | SNP     | GtGGCAtCCATACaGgGTAgGGG | GGGGCAGCCATACCGCGTAANGG |  |
| chrX                                    | 18413417  | G    | C   | intergenic | SCML2;CDKL5       | SNP     | GaGGCtGCCAaACCaCcTAAGGG | GGGGCAGCCATACCGCGTAANGG |  |
| chr11                                   | 11317799  | G    | A   | intronic   | GALNT18           | SNP     | GGaGaAGCCATgCCGCaTtAGGG | GGGGCAGCCATACCGCGTAANGG |  |
| chr10                                   | 134446406 | C    | T   | intronic   | INPP5A            | SNP     | GGGGCAttCAcACcTcGgAAGGG | GGGGCAGCCATACCGCGTAANGG |  |
| chr18                                   | 25540302  | C    | T   | intronic   | CDH2              | SNP     | GGGtCAGgCATAcAGaGTAtGGG | GGGGCAGCCATACCGCGTAANGG |  |
| chr20                                   | 44842922  | G    | A   | intronic   | CDH22             | SNP     | GaGGCAGCCActCCaCGcAAGGG | GGGGCAGCCATACCGCGTAANGG |  |
| chr11                                   | 107263096 | G    | A   | intronic   | CWF19L2           | SNP     | GGGGtAtCCATACacaGTAATGG | GGGGCAGCCATACCGCGTAANGG |  |
| chr11                                   | 107263213 | A    | G   | intronic   | CWF19L2           | SNP     | GGGGtAtCCATACacaGTAATGG | GGGGCAGCCATACCGCGTAANGG |  |
| chr11                                   | 107263150 | A    | G   | intronic   | CWF19L2           | SNP     | GGGGtAtCCATACacaGTAATGG | GGGGCAGCCATACCGCGTAANGG |  |
| chr13                                   | 39592564  | C    | A   | intronic   | PROSER1           | SNP     | GtGaCAGgCATAcAGtGTAAAGG | GGGGCAGCCATACCGCGTAANGG |  |
| chr2                                    | 44973791  | A    | T   | intronic   | CAMKMT            | SNP     | GGtGCAGCCATACcTgcaAAAGG | GGGGCAGCCATACCGCGTAANGG |  |
| chrX                                    | 152908152 | A    | G   | intronic   | DUSP9             | SNP     | GGGGCAGCCAggCCgGTggGGG  | GGGGCAGCCATACCGCGTAANGG |  |
| chr1                                    | 14925003  | C    | T   | upstream   | KAZN              | SNP     | GGGGCtGCCccACCGCtcAAGGG | GGGGCAGCCATACCGCGTAANGG |  |

## Supplementary Table 2

Unique SNVs and indels in the HELP (UL29 gRNA) treated human cornea uncovered by whole genome sequencing.

| HELP induced SNVs and indels (UL29 gRNA) |           |      |       |            |                        |         |                        |                        |  |
|------------------------------------------|-----------|------|-------|------------|------------------------|---------|------------------------|------------------------|--|
| #CHRO                                    | POS       | REF  | ALT   | Func       | Gene                   | MutType | DNA                    | crRNA                  |  |
| chr9                                     | 132279711 | T    | TTTTC | intergenic | LINC00963;NTMT1        | InDel   | cgGAGtGTACTCGTtTCCCAGG | GCGAGCGTACACGTATCCCNGG |  |
| chrX                                     | 38942374  | GA   | G     | intergenic | MID1IP1;LINC01281      | InDel   | GtGAGCcTgCACcTtTCCCTGG | GCGAGCGTACACGTATCCCNGG |  |
| chr2                                     | 27051725  | CAAA | C     | intergenic | CENPA;DPYSL5           | InDel   | cCcAGtGTtCACtTATCCCAGG | GCGAGCGTACACGTATCCCNGG |  |
| chr11                                    | 1554083   | GC   | G     | intergenic | MOB2;DUSP8             | InDel   | GcCAGCGcACACGgcTCCCTGG | GCGAGCGTACACGTATCCCNGG |  |
| chr7                                     | 88796758  | T    | TATAA | intronic   | ZNF804B                | InDel   | GCGAGaGTtCACtTATaCaGGG | GCGAGCGTACACGTATCCCNGG |  |
| chr9                                     | 120670834 | C    | A     | intergenic | TLR4;BRINP1            | SNP     | ctGAGCcTACACaTtTCCCTGG | GCGAGCGTACACGTATCCCNGG |  |
| chr5                                     | 1687054   | G    | A     | intergenic | LOC728613;MIR4277      | SNP     | GgGAGaGTACTtGgATCCCAGG | GCGAGCGTACACGTATCCCNGG |  |
| chr7                                     | 27362607  | G    | A     | intergenic | EVX1;HIBADH            | SNP     | GCGAatGTACAgTgTCCCTGG  | GCGAGCGTACACGTATCCCNGG |  |
| chr10                                    | 106298543 | A    | G     | intergenic | LOC101927523;SORCS3    | SNP     | GCGAGgGTACAtGataCCCAGG | GCGAGCGTACACGTATCCCNGG |  |
| chr8                                     | 59617284  | T    | A     | intergenic | NSMAF;TOX              | SNP     | GaGAGCacACACaTtTCCCTGG | GCGAGCGTACACGTATCCCNGG |  |
| chr1                                     | 235056669 | A    | G     | intergenic | LINC01132;LOC101927851 | SNP     | GtGAGCacACACaTAgCCCGGG | GCGAGCGTACACGTATCCCNGG |  |
| chr17                                    | 77924776  | C    | T     | intronic   | TBC1D16                | SNP     | GCGAGCagtCACGaATCCaGGG | GCGAGCGTACACGTATCCCNGG |  |
| chr11                                    | 34532204  | T    | C     | intronic   | ELF5                   | SNP     | GCctGtGTtCACaTATCCCTGG | GCGAGCGTACACGTATCCCNGG |  |
| chr7                                     | 157437264 | C    | T     | intronic   | PTPRN2                 | SNP     | GcCAGCaTACgCcTcTCCCAGG | GCGAGCGTACACGTATCCCNGG |  |
| chr11                                    | 7646378   | T    | C     | intronic   | PPFIBP2                | SNP     | GtGAGCGTgCACacATgCCTGG | GCGAGCGTACACGTATCCCNGG |  |
| chr2                                     | 238789202 | T    | C     | intronic   | RAMP1                  | SNP     | GtGgGtGTACACacATCCCAGG | GCGAGCGTACACGTATCCCNGG |  |
| chr19                                    | 4406160   | G    | A     | intronic   | CHAF1A                 | SNP     | GgGAGCGTAgcaGcATCCCTGG | GCGAGCGTACACGTATCCCNGG |  |
| chr4                                     | 151170387 | G    | A     | intronic   | DCLK2                  | SNP     | GaGAGgGcACAgGTcTCCCGGG | GCGAGCGTACACGTATCCCNGG |  |
| chr7                                     | 88796887  | T    | C     | intronic   | ZNF804B                | SNP     | GCGAGaGTtCACtTATaCaGGG | GCGAGCGTACACGTATCCCNGG |  |
| chr9                                     | 80911421  | G    | T     | upstream   | PSAT1                  | SNP     | GCGgGCaTcCACGctTCCCAGG | GCGAGCGTACACGTATCCCNGG |  |
| chr14                                    | 104002611 | T    | C     | UTR3       | TRMT61A                | SNP     | GgGcGCaTACAaGTAaCCCAGG | GCGAGCGTACACGTATCCCNGG |  |
| chr9                                     | 127962972 | G    | A     | UTR5       | RABEPK                 | SNP     | GCGAGgGTcCcCGgATaCCGGG | GCGAGCGTACACGTATCCCNGG |  |

**Supplementary Table 3**

gRNA sequences and primers used to amplify the target sites for TIDE analysis.

| Target sites | gRNA Sequence (5'-3') | Primer names | Sequence (5'-3')                             |
|--------------|-----------------------|--------------|----------------------------------------------|
| UL8          | GGGGCAGCCATACCGCGTAA  | Y1-F<br>Y2-R | gagccgtagaatcccgcag<br>aacctcaccaaacagaaa    |
| UL29         | GCGAGCGTACACGTATCCC   | Y3-F<br>Y4-R | gggtgtagtccgaaaagccaa<br>cacgccccaggtaaagtga |

**Supplementary Table 4**  
Primers used in RT-PCR.

| Primer names        | Sequence (5'-3')         |
|---------------------|--------------------------|
| Y5-HSV-gD-F         | tacaacctgaccatcgcttg     |
| Y6-HSV-gD-R         | gccccagagacttggtgta      |
| SK13-GAPDH(Mouse)-F | gtgttctacccccaatgtg      |
| SK14-GAPDH(Mouse)-R | tagcccaagatgcccttcag     |
| SK9-WPRE-F          | gtcctttccatggctgctc      |
| SK10-WPRE-R         | ccgaaggagcgtagcaga       |
| SK11-Cas9-F         | cagattcgcctggatgacca     |
| SK12-Cas9-R         | atccgctcgatgaagctctg     |
| SK55-GAPDH(Human)-F | tccactggcgtcttcacc       |
| SK56-GAPDH(Human)-R | ggcagagatgatgacccttt     |
| SK51-ISG15(Mouse)-F | caggacggctttacccttcc     |
| SK52-ISG15(Mouse)-R | aggctcgctgcagttctgtac    |
| Y7-RIG1(Mouse)-F    | gccctgtaccatgcaggttac    |
| Y8-RIG1(Mouse)-R    | agtccaactttc gatggctt    |
| Y9-IFNB1(Mouse)-F   | agctccaagaaaggacgaaca    |
| Y10-IFNB1(Mouse)-R  | gccctgtaggtgaggttgat     |
| Y11-ISG15(Human)-F  | ggcagcgaactcatcttt       |
| Y12-ISG15(Human)-R  | cagcatcttcaccgtcag       |
| Y13-RIG1(Human)-F   | tggaccctacctacatcctg     |
| Y14-RIG1(Human)-R   | tggaccctacctacatcctg     |
| Y15-IFNB1(Human)-F  | ttcagtgtcagaagctcctgtgg  |
| Y16-IFNB1(Human)-R  | ctgcttaatctcctcagggatgca |
| Y17-IL6(Mouse)-F    | catgttctctgggaaatcgtg    |
| Y18-IL6(Mouse)-R    | ttctgcaagtgcacatcg       |
| Y19-CCL2(Mouse)-F   | aggtgtcccaaagaagctgta    |
| Y20-CCL2(Mouse)-R   | tctggaccattccttcttg      |
| Y21-CXCL10(Mouse)-F | gtcattttctgcctcatcctgct  |
| Y22-CXCL10(Mouse)-R | ggattcagacatctctgctcatca |
| Y23-GAPDH(Mouse)-F  | aggtcgggtgtaacggatttg    |
| Y24-GAPDH(Mouse)-R  | ggggctcgttgatggcaaca     |



**Supplementary Table 5**

Primers used to amplify the on-target and the predicted off-target sites for NGS.

| On- and off-targets   | gRNA Sequence (5'-3') | Primer names | Sequence (5'-3')       |
|-----------------------|-----------------------|--------------|------------------------|
| UL8 On-target         | GGGGCAGCCATACCGCGTAA  | Y1-F         | gagccgtagaaatcccgcag   |
|                       |                       | Y2-R         | ggacaccgcagatatcgtgt   |
| UL8 Off-target-Mus 1  | GGCGATGCCAAACCGCGTAA  | Y29-F        | cccacagaccacgttcttc    |
|                       |                       | Y30-R        | gtcagagtttaggagcacacc  |
| UL8 Off-target-Mus 2  | GGCAAAGCCATACCCCGTAA  | Y31-F        | agaagccgagtgaggaaagc   |
|                       |                       | Y32-R        | gctgtaaacacctgagtgga   |
| UL8 Off-target-Mus 3  | GCAGCAGCCATACCGCCTCA  | Y33-F        | cagagtgggcagacagatagg  |
|                       |                       | Y34-R        | gtctcgtcctcatttaacgc   |
| UL8 Off-target-Mus 4  | AGGGCAGCCATACCCCTGA   | Y35-F        | ccaacctactgcactgagc    |
|                       |                       | Y36-R        | agagtcagagtggtccatg    |
| UL8 Off-target-Mus 5  | GGGGCAGGCATAGAGCATAA  | Y37-F        | tggaggggaagaaatacgtgc  |
|                       |                       | Y38-R        | gagaggggagagaaggttgatt |
| UL8 Off-target-Mus 6  | GGGGCTGCCATACAGAATAA  | Y39-F        | tccacctgtggcctctatac   |
|                       |                       | Y40-R        | cttcttgtgtctcgcttgcc   |
| UL29 On-target        | GCGAGCGTACACGTATCCC   | Y3-F         | cgccgacagtaacgccagaa   |
| UL29 Off-target-Mus 1 | GCGAGCGCACAAGGATCCC   | Y4-R         | gtttgcgaccgattgccag    |
|                       |                       | Y53-F        | ggaccagcagaagtgagtacg  |
| UL29 Off-target-Mus 2 | GCGAGCACTCACATATCCC   | Y54-R        | ggaggcttgatgcccaatga   |
|                       |                       | Y55-F        | tccagatcctgctgcccttg   |
| UL29 Off-target-Mus 3 | GAGAGTGTTCAAGTATCCC   | Y56-R        | cctgggtttcatggatcatgcc |
|                       |                       | Y57-F        | gaggtagcacaagattgcaaa  |
| UL29 Off-target-Mus 4 | GGCGAGCTTAGACGTTTTCC  | Y58-R        | ccacgtttgctccagcctta   |
|                       |                       | Y59-F        | ttgctttgtttatgtttgct   |
| UL29 Off-target-Mus 5 | GTGAGACTACACGTCTCCCC  | Y60-R        | ttacaatggacaagcccagg   |
|                       |                       | Y61-F        | acaacaaggctcagggaaatg  |
| UL29 Off-target-Mus 6 | GCGCGCGCCCCCGTATCCC   | Y62-R        | catgctgttggttaaggaga   |
|                       |                       | Y63-F        | gaagcccagactccgcaggt   |
|                       |                       | Y64-R        | tgggaagtcttcgacgtgtg   |
